# Supplementary material for: Dendrobium officinale Polysaccharides Inhibit 1-Methyl-2-Nitro-1-Nitrosoguanidine Induced Precancerous Lesions of Gastric Cancer in Rats through Regulating Wnt/β-Catenin Pathway and Altering Serum Endogenous Metabolites
Source: MDPI journal article supplement (doi:10.3390/molecules24142660), 2019-07-23
Supplement: s1 [file s1]

1. RT-PCR primer sequences

Table S1 RT-PCR primer sequences

| Gene name        | Forward primer           | Reverse primer         |
|------------------|--------------------------|------------------------|
| $\beta$ -actin   | CCCATCTATGAGGGTTACGC     | TTTAATGTCACGCACGATTTC  |
| Wnt2 $\beta$     | GATGGGGCCAATTTACAGC      | AGTTGTGTCATACCCTCGGC   |
| $\beta$ -catenin | CTTACGGCAATCAGGAAAGC     | GACAGACAGCACCTTCAGCA   |
| Gsk3 $\beta$     | ACACCTGCCCTCTTCAACTTTACC | ATTGGTCTGTCCACGGTCTCCA |
| CyclinD1         | GCGTACCCTGACACCAATCT     | GCTCCAGAGACAAGAAACG    |
| PCNA             | AGGGCTGAAGATAATGCTGATA   | CTCATTCTCTCTATGGTCACAG |

2. Total serum ion map in positive and negative mode

The peak of each group have great resolution and the baseline is stable which is indicated that the experimental conditions could separate the substances and was suitable for detecting the endogenous substances in rats serum(Figure. S2).

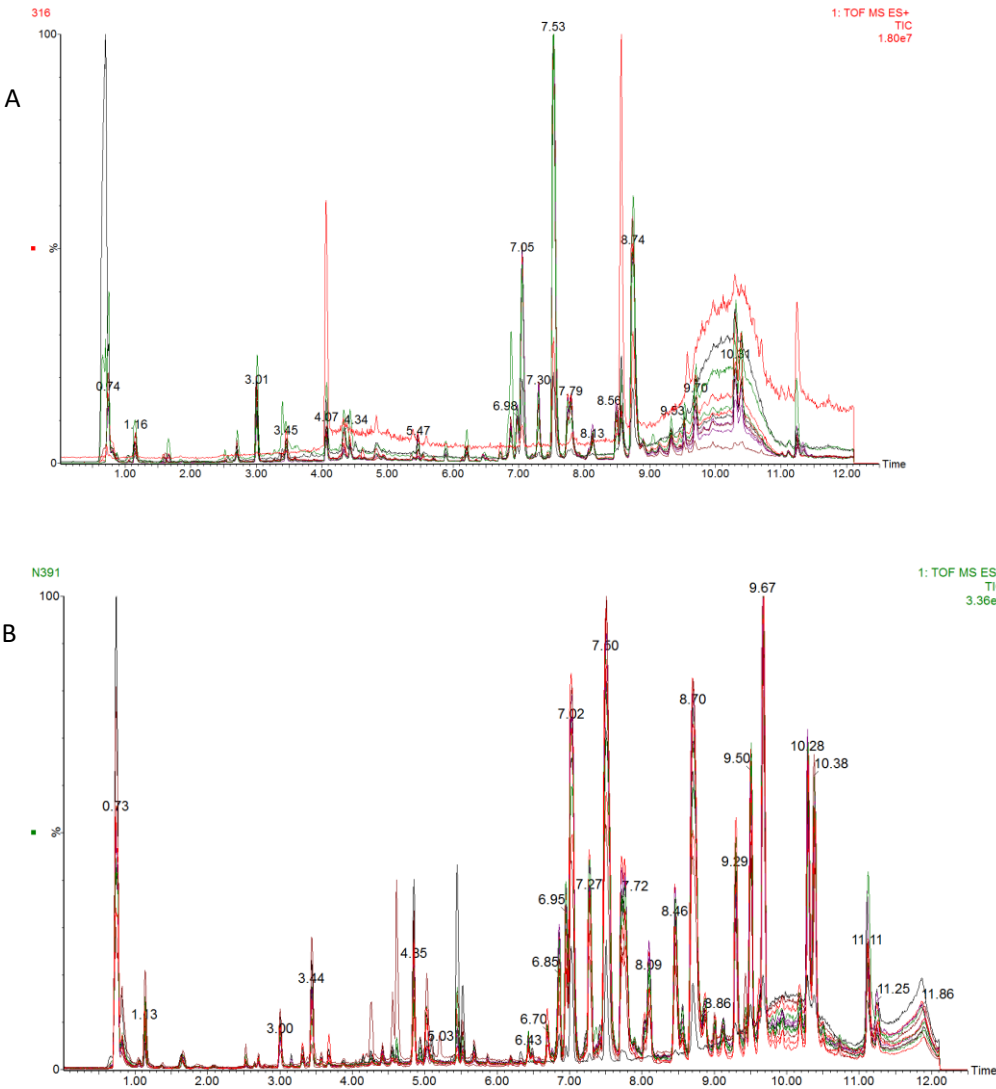

**Figure S1.** The effect of DOP on the total ion chromatogram (TIC). Results from administering DOP 7 months on PLGC rat model, then collecting the serum to build the available method by UPLC/Q-TOF-MS. The detail UPLC and Q-TOF-MS methods were described in the Materials and Methods. The different color of the ion chromatogram means the one sample from the each group, the result showed that the peak time of sample was the same and indicated that this method will be fit for the all groups. A: the total ion chromatogram on the positive mode; B. the total ion flow chromatogram on the negative mode.

3. The Western blot analysis of other two samples, the result indicated that expression of Wnt2 $\beta$ ,  $\beta$ -cetanin, PCNA, CyclinD1 were all upregulated in the PLGC model group than the CTRL group, after treated with DOP, the H-DOP could significantly downregulated the expression of Wnt2 $\beta$ ,  $\beta$ -cetanin, PCNA and CyclinD1.

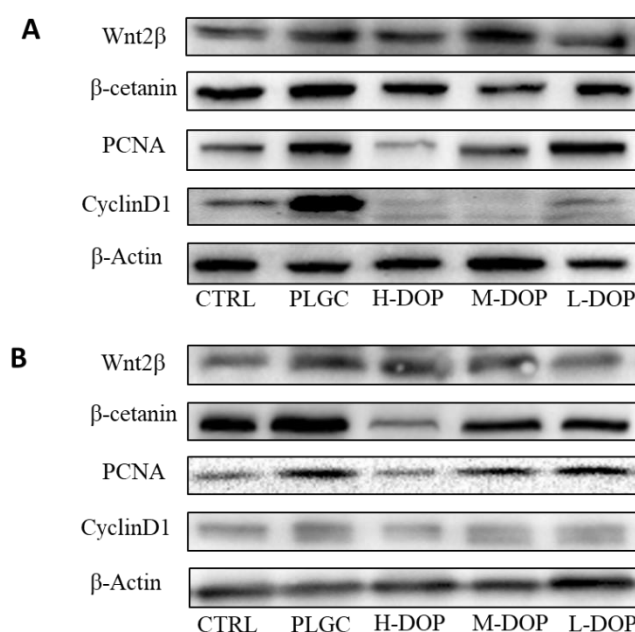

**Figure S2.** The Western blot analysis of other two samples. (A. the first sample; B the second sample)
